# Supplementary material for: Common Cell Shape Evolution of Two Nasopharyngeal Pathogens
Source: PubMed Central journal article supplement (PMC4498754; doi:10.1371/journal.pgen.1005338), 2015-07-10

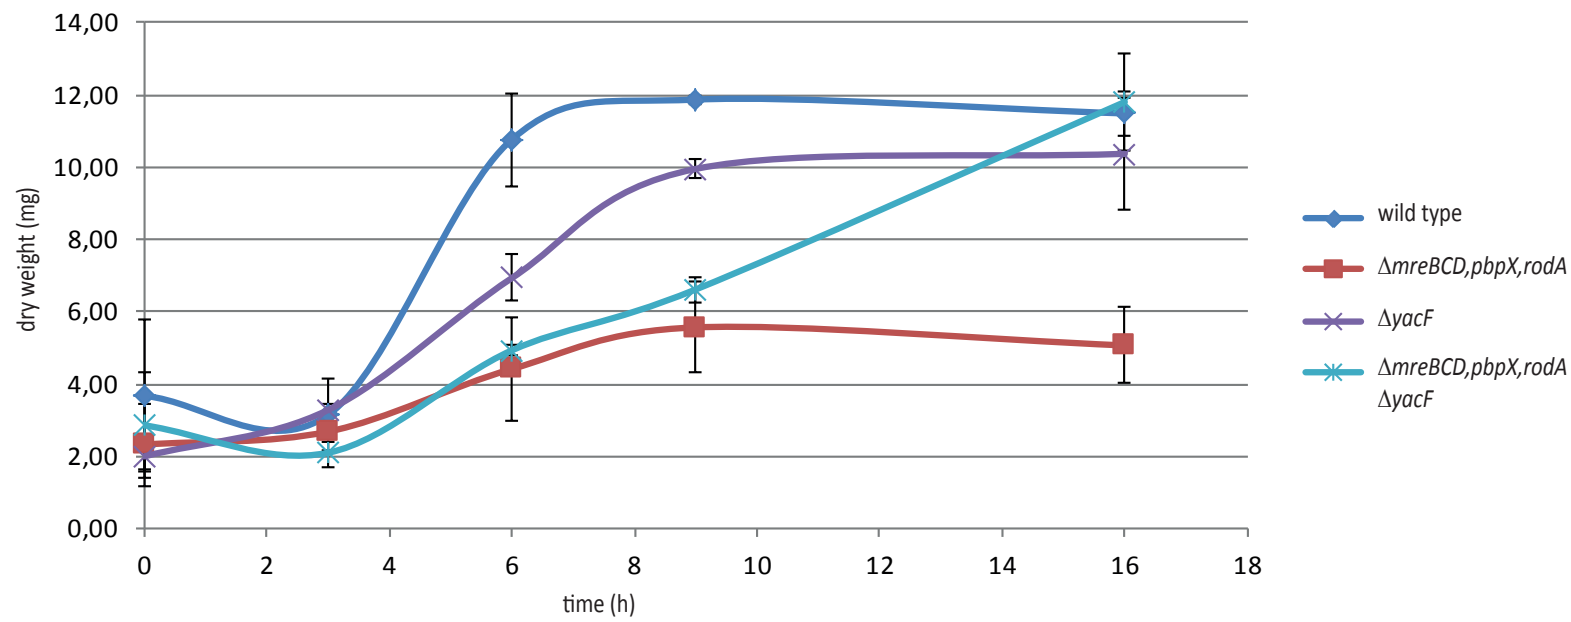

Supplement: pgen.1005338.s002.pdf [file pgen.1005338.s002.pdf]
