# Supplementary material for: Common Cell Shape Evolution of Two Nasopharyngeal Pathogens
Source: PLoS Genet. 2015 Jul 10;11(7):e1005338. doi: 10.1371/journal.pgen.1005338 (PMC4498754; doi:10.1371/journal.pgen.1005338)
Supplement: S3 Table — List of genes found up or down regulated in the different mutants compared to wild type N. elongata. (XLS) [file pgen.1005338.s006.xls]

## Sheet: gene sign. mreBCD,pbpX, rodA
Name	DB_Object_ID	DB_Object_Symbol	DB_Object_Name	DB_Object_Synonym		start	end	Fold change
NELON_00650					chr 1	115404	115607	0.296601
NELON_01275					chr 1	242916	244223	2.20372
NELON_01305					chr 1	252430	251537	2.46989
NELON_01455					chr 1	271353	272675	0.336519
NELON_01500					chr 1	279975	279733	2.21358
NELON_01545					chr 1	289325	288450	5.27986
NELON_01760					chr 1	332630	333976	0.494461
NELON_01800					chr 1	340463	339492	2.69373
NELON_01875					chr 1	352574	351597	0.31547
nusA	O83862, P9WIV3	nusA	N utilization substance protein A (NusA), Transcription termination/antitermination protein NusA	O83862_TREPA, nusA, TP_0892, TPANIC_0892, NUSA_MYCTU, Rv2841c, MTCY16B7.01, MTCY24A1.16	chr 1	511256	509754	3.02097
NELON_02855					chr 1	539046	539567	2.261
NELON_02860					chr 1	539597	540964	2.76115
NELON_02880					chr 1	541655	542737	2.28234
murC	A5PJI6, E2R0B0, F1SSC7, P94335, P9WJL7, Q5BKX8, Q9KPG8	MURC	Muscle-related coiled-coil protein, Uncharacterized protein, UDP-N-acetylmuramate--L-alanine ligase	MURC_BOVIN, MURC, E2R0B0_CANFA, F1SSC7_PIG, MURC_CORGL, Cgl2157, cg2368, MURC_MYCTU, Rv2152c, MTCY270.16, MURC_HUMAN, MURC_VIBCH, VC_2400	chr 1	547998	549410	3.34262
NELON_02915					chr 1	549535	550446	2.90246
NELON_02920					chr 1	550436	551185	3.30154
NELON_02925					chr 1	551210	552457	3.12413
NELON_02985					chr 1	564739	566643	4.60755
NELON_03140					chr 1	600305	602098	4.28448
NELON_03145					chr 1	602169	602504	4.82555
amiC	P27017, P74390, P9WQ95	amiC	Aliphatic amidase expression-regulating protein, Negative aliphatic amidase regulator, Putative amidase AmiC	AMIC_PSEAE, amiC, PA3364, P74390_SYNY3, AMI3_MYCTU, Rv2888c, MTCY274.19c	chr 1	610785	609478	4.26794
NELON_03195					chr 1	611440	612252	3.93682
NELON_03205					chr 1	614294	612480	3.3295
NELON_03210					chr 1	614649	614287	4.27343
NELON_03230					chr 1	617793	618206	3.96832
NELON_03285					chr 1	629985	628873	2.099
fabG	O07399, O54438, O67610, P0A0I0, P0A2C9, P0A2D0, P0A5Y5, P0AEK3, P38004, P43713, P50941, P55336, P71534, P99093, Q1RKB7, Q4UK62, Q5HGK2, Q5HPW0, Q68VY7, Q6G9Y2, Q6GHK4, Q8CPI3, Q8I2S7, Q92GE0, Q9KQH7, Q9X248	fabG	3-oxoacyl-[acyl-carrier-protein] reductase FabG, 3-oxoacyl-(Acyl-carrier protein) reductase	FABG_MYCAV, fabG, FABG_PSEAE, PA2967, FABG_AQUAE, aq_1716, FABG_STAAW, MW1114, FABG_SALTY, STM1195, FABG_SALTI, STY1234, t1725, FABG_MYCBO, fabG1, Mb1519, FABG_SHIFL, S1177, SF1097, FABG_CHLTR, CT_237, FABG_HAEIN, HI_0155, FABG_RICPR, RP762, FABG_VIBHA, FABG_MYCS2, MSMEG_3150, MSMEI_3069, FABG_STAAN, SA1074, FABG_RICBR, RBE_0116, FABG_RICFE, RF_1222, FABG_STAAC, SACOL1245, FABG_STAEQ, SERP0797, F…	chr 1	632871	632143	2.12832
NELON_03690					chr 1	705633	706448	2.29913
NELON_03780					chr 1	724796	726997	0.416444
NELON_03800					chr 1	728995	729720	0.417851
NELON_04110					chr 1	794457	792520	0.361648
NELON_04340					chr 1	838074	839969	0.352246
NELON_04625					chr 1	892616	893509	0.407079
NELON_04730					chr 1	910606	911916	2.23936
NELON_04885					chr 1	939255	938611	0.427284
NELON_05040					chr 1	968154	969698	0.461467
NELON_05045					chr 1	969701	970252	0.347257
NELON_05125					chr 1	985014	986375	6.73246
NELON_05335					chr 1	1024322	1024035	0.409002
NELON_05465					chr 1	1050358	1047170	3.32404
NELON_05540					chr 1	1066756	1064960	2.45295
NELON_05685					chr 1	1094982	1095731	3.87194
NELON_05700					chr 1	1096940	1099357	0.333911
NELON_06030					chr 1	1161257	1160043	0.443365
lldD	P9WND5, Q0C2Y3, Q9KKW6	lldD	Putative L-lactate dehydrogenase, L-lactate dehydrogenase (Cytochrome)	LLDD_MYCTU, lldD, lldD2, Rv1872c, Q0C2Y3_HYPNA, HNE_1192, LLDD_VIBCH, VC_A0984	chr 1	1161956	1163125	0.35406
NELON_06195					chr 1	1191834	1190209	2.25156
NELON_06200					chr 1	1192426	1191935	14.4391
NELON_06240					chr 1	1198682	1199167	0.332963
NELON_06390					chr 1	1233120	1233656	2.01595
NELON_06425					chr 1	1242028	1239986	0.393564
NELON_06815					chr 1	1314234	1315571	0.137216
NELON_07350					chr 1	1411164	1413083	2.89564
NELON_08390					chr 1	1599812	1597047	0.431406
NELON_08660					chr 1	1646521	1646036	0.348992
NELON_08725					chr 1	1657681	1659315	0.423341
NELON_08935					chr 1	1701656	1701916	2.02213
NELON_09135					chr 1	1738976	1738404	0.438264
NELON_09510					chr 1	1809488	1808055	0.38963
NELON_09515					chr 1	1810841	1809657	0.367048
sucA	Q0ZR37	SucA	Extracellular invertase	Q0ZR37_ASPNG, SucA	chr 1	1813736	1810905	0.337946
adhP					chr 1	1845877	1844843	0.420633
NELON_09915					chr 1	1894578	1895453	2.09166
NELON_10475					chr 1	2001970	2002650	3.6706
NELON_10650					chr 1	2042345	2041305	0.36524
NELON_10855					chr 1	2082631	2083557	2.82106
NELON_11400					chr 1	2198506	2197325	0.33427
NELON_11405					chr 1	2199346	2198528	0.311598

## Sheet: gene sign. yacF
Name	DB_Object_ID	DB_Object_Symbol	DB_Object_Name	DB_Object_Synonym	chr 1	start	end	Fold change 2
NELON_00070					chr 1	9837	10130	9.248173975
NELON_00380					chr 1	71171	70821	2.509203191
NELON_00480					chr 1	90501	89881	0.254817957
NELON_00570					chr 1	104479	106323	2.044910644
NELON_00890					chr 1	163436	162516	0.481099008
NELON_00975					chr 1	178980	178078	3.359351355
NELON_01065					chr 1	201031	200648	0.44691213
NELON_01915					chr 1	360392	359433	4.174830921
NELON_02010					chr 1	383733	382102	3.664694954
NELON_02060					chr 1	391313	390834	20.89807573
NELON_02085					chr 1	395198	397222	2.335401762
NELON_03045					chr 1	579403	579720	0.406278012
NELON_03145					chr 1	602169	602504	3.070090399
NELON_03185					chr 1	611240	610755	2.978744337
NELON_03230					chr 1	617793	618206	0.470932727
NELON_03330					chr 1	638452	637208	2.212630574
NELON_03355					chr 1	646766	645870	3.811685296
NELON_03380					chr 1	649700	650059	0.274386693
NELON_03720					chr 1	712186	712959	0.492281089
NELON_03740					chr 1	716933	717355	0.495509551
NELON_03805					chr 1	731051	729837	0.326782201
NELON_03810					chr 1	731646	731119	0.400621644
NELON_04245					chr 1	821034	819964	3.336886333
NELON_04250					chr 1	821882	821031	3.336563448
NELON_04295					chr 1	832167	829594	0.445885628
NELON_04320					chr 1	835648	835229	0.446762232
NELON_04385					chr 1	847113	848123	0.319515764
NELON_04850					chr 1	933191	932964	0.303036604
NELON_04865					chr 1	935707	935063	7.132575764
NELON_04935					chr 1	949483	950505	0.414870634
NELON_05030					chr 1	966270	965356	3.693156516
NELON_05300					chr 1	1018954	1018316	0.494166996
NELON_05370					chr 1	1029339	1028349	3.760934568
NELON_05465					chr 1	1050358	1047170	4.547665749
NELON_05645					chr 1	1089957	1086388	6.066825817
NELON_05655					chr 1	1091047	1090667	2.900954971
NELON_05830					chr 1	1124844	1123051	2.586066432
NELON_05950					chr 1	1150262	1150624	0.475415832
NELON_06125					chr 1	1176297	1175668	30.62360295
NELON_06130					chr 1	1177429	1176380	11.43518035
NELON_06140					chr 1	1178447	1180282	26.08070943
NELON_06800					chr 1	1313303	1311945	0.483751846
NELON_06815					chr 1	1314234	1315571	0.297343298
NELON_06820					chr 1	1315765	1316172	0.453733182
NELON_06830					chr 1	1317996	1319045	3.638810742
glcF	Q48GR9, Q4KEF9	glcF	Glycolate oxidase, iron-sulfur subunit	Q48GR9_PSE14, glcF, PSPPH_3254, Q4KEF9_PSEF5, PFL_2267	chr 1	1389344	1388121	3.88394345
NELON_08315					chr 1	1583130	1583846	3.131937372
NELON_09130					chr 1	1738326	1737721	0.457080204
NELON_09845					chr 1	1877028	1876660	0.390566872
NELON_09920					chr 1	1895471	1896592	0.478367739
NELON_09955					chr 1	1902089	1901736	0.272952066
NELON_10020					chr 1	1912123	1912749	2.838045379
NELON_10245					chr 1	1955941	1956573	6.342294697
NELON_10280					chr 1	1962830	1963729	4.409392402
NELON_11160					chr 1	2146230	2146859	0.393387591
NELON_11200					chr 1	2154452	2153532	5.528940459

## Sheet: gene sign. double mutant 
Name	DB_Object_ID	DB_Object_Symbol	DB_Object_Name	DB_Object_Synonym		start	end	Fold change ΔmreBCD,pbpX,rodA	Fold change ΔyacF	Fold change ΔmreBCD,pbpX,rodA ΔyacF
NELON_06225					chr1	1198167	1197124	0.00146093	0.748056	0.00179451
NELON_06220					chr1	1197105	1196230		0.70508	0.00265138
NELON_06210					chr1	1195723	1193669	0.0108948	0.8335	0.00935339
NELON_06815					chr1	1314234	1315571	0.137216	0.297343	0.131662
NELON_07050					chr1	1353200	1352790	0.469851	1.93366	0.21102
NELON_05730					chr1	1103605	1103964		1.59798	0.251928
NELON_10710					chr1	2052617	2054380	0.393165	0.975178	0.253267
NELON_04110					chr1	794457	792520	0.361648	0.510978	0.296636
NELON_07820					chr1	1491253	1492467	0.297698	0.951355	0.297946
NELON_10150					chr1	1936774	1937973	0.410121	1.74567	0.306826
NELON_06235					chr1	1198363	1198653	0.291869	0.831539	0.315918
NELON_04385					chr1	847113	848123	0.510125	0.319516	0.317749
NELON_09130					chr1	1738326	1737721	0.355159	0.45708	0.319019
NELON_06425					chr1	1242028	1239986	0.393564	1.78196	0.332196
NELON_05700					chr1	1096940	1099357	0.333911	1.36695	0.332958
NELON_04930					chr1	948069	949286	0.432723	1.43797	0.333181
NELON_11405					chr1	2199346	2198528	0.311598	1.63521	0.33777
NELON_07055					chr1	1353743	1353273	0.323743	1.60343	0.341335
NELON_11660					chr1	2248084	2249187	0.285141	0.573747	0.341657
NELON_03615					chr1	686881	688263	0.453289	0.941629	0.345067
NELON_05635					chr1	1085936	1084911	0.457748	0.724427	0.351515
NELON_08790					chr1	1670912	1672126	0.578257	1.19408	0.352351
NELON_10650					chr1	2042345	2041305	0.36524	0.678992	0.356574
NELON_08390					chr1	1599812	1597047	0.431406	0.757712	0.359523
NELON_11555					chr1	2223327	2222692	0.462938	0.603093	0.35976
NELON_01455					chr1	271353	272675	0.336519	0.617737	0.361608
NELON_08300					chr1	1580994	1581524	0.348712	0.51859	0.362232
NELON_03740					chr1	716933	717355	0.280141	0.49551	0.364046
NELON_11400					chr1	2198506	2197325	0.33427	1.69457	0.368494
adhP					chr1	1845877	1844843	0.420633	0.609522	0.373488
NELON_04620					chr1	891054	892619	0.387073	0.809585	0.374149
NELON_06240					chr1	1198682	1199167	0.332963	0.686774	0.374411
NELON_11465					chr1	2207559	2208098	0.527997	0.695452	0.37799
NELON_01055					chr1	197623	199929	0.377378	0.555291	0.385285
NELON_06365					chr1	1228794	1231229	0.35665	0.544247	0.388268
NELON_04340					chr1	838074	839969	0.352246	0.717884	0.392454
NELON_11460					chr1	2206393	2207322	0.923666	1.56324	0.393732
NELON_00650					chr1	115404	115607	0.296601	1.61753	0.395723
NELON_00040					chr1	4888	6416	0.448429	0.685294	0.412014
NELON_09135					chr1	1738976	1738404	0.438264	0.50749	0.415391
NELON_05335					chr1	1024322	1024035	0.409002	0.560503	0.420745
NELON_05045					chr1	969701	970252	0.347257	0.917953	0.421938
NELON_11655					chr1	2246536	2248064	0.49523	0.791101	0.426901
NELON_07270					chr1	1399230	1398259	0.714443	1.04983	0.427807
NELON_09445					chr1	1795989	1795126	0.549977	0.994616	0.429828
NELON_05710					chr1	1101218	1100490	0.305879	1.04829	0.430187
dnaK	A1A766, A5I640, C4ZPU0, O34241, P9WMJ9, Q5HV33	dnaK	Chaperone protein DnaK	DNAK_ECOK1, dnaK, Ecok1_00120, APECO1_1965, DNAK_CLOBH, CBO2959, CLC_2855, C4ZPU0_ECOBW, BWG_0013, DNAK_VIBCH, VC_0855, DNAK_MYCTU, Rv0350, MTCY13E10.10, DNAK_CAMJR, CJE0850	chr1	439450	441381	0.417932	0.564632	0.433467
NELON_11600					chr1	2234667	2234332	0.328379	0.762362	0.434251
NELON_06795					chr1	1311758	1311465	0.43408	0.491197	0.435898
NELON_01920					chr1	361908	360460	0.414557	1.44558	0.436605
NELON_04265					chr1	824366	825097	0.466441	0.490221	0.437124
NELON_05995					chr1	1157278	1155425	0.556795	0.685669	0.440895
NELON_05580					chr1	1075217	1073838	0.517749	1.02861	0.447678
NELON_06000					chr1	1157820	1157320	0.543669	0.789194	0.448023
sucA	Q0ZR37	SucA	Extracellular invertase	Q0ZR37_ASPNG, SucA	chr1	1813736	1810905	0.337946	0.629038	0.453006
NELON_09040					chr1	1722507	1721239	0.494621	1.35016	0.454094
NELON_01750					chr1	331749	331120	0.614748	1.34694	0.45646
NELON_06360					chr1	1228599	1228330	0.900426	0.685186	0.458316
NELON_10295					chr1	1966381	1965533	0.618183	1.2206	0.460664
NELON_02005					chr1	381860	381201	0.468001	1.50571	0.460702
NELON_05625					chr1	1083799	1083005	0.494155	1.32064	0.461645
NELON_05715					chr1	1103034	1101211	0.412913	1.14301	0.466874
NELON_06030					chr1	1161257	1160043	0.443365	0.655243	0.468265
NELON_04995					chr1	961427	962202	0.527993	1.05828	0.469468
NELON_07060					chr1	1354064	1357711	0.455454	1.38205	0.470473
NELON_08725					chr1	1657681	1659315	0.423341	0.630597	0.479674
NELON_09510					chr1	1809488	1808055	0.38963	0.818074	0.481479
NELON_09755					chr1	1861477	1860434	0.604721	0.857296	0.496706
NELON_04205					chr1	813101	814186	1.1082	1.04453	0.498581
NELON_02990					chr1	567056	569866	1.67078	1.90634	2.018
NELON_10870					chr1	2084402	2085652	1.97619	0.807494	2.02067
NELON_03225					chr1	616665	617441	1.91336	1.08479	2.03139
NELON_01275					chr1	242916	244223	2.20372	1.99671	2.03621
NELON_06590					chr1	1274965	1275693	1.53377	1.3306	2.0367
NELON_07530					chr1	1438901	1438548	1.65973	0.90768	2.04075
NELON_03850					chr1	739789	739136	2.57692	0.880696	2.04081
NELON_02900					chr1	546623	547696	1.95021	0.919081	2.05598
NELON_05595					chr1	1077441	1076875	1.70037	1.22942	2.05897
fabG	O07399, O54438, O67610, P0A0I0, P0A2C9, P0A2D0, P0A5Y5, P0AEK3, P38004, P43713, P50941, P55336, P71534, P99093, Q1RKB7, Q4UK62, Q5HGK2, Q5HPW0, Q68VY7, Q6G9Y2, Q6GHK4, Q8CPI3, Q8I2S7, Q92GE0, Q9KQH7, Q9X248	fabG	3-oxoacyl-[acyl-carrier-protein] reductase FabG, 3-oxoacyl-(Acyl-carrier protein) reductase	FABG_MYCAV, fabG, FABG_PSEAE, PA2967, FABG_AQUAE, aq_1716, FABG_STAAW, MW1114, FABG_SALTY, STM1195, FABG_SALTI, STY1234, t1725, FABG_MYCBO, fabG1, Mb1519, FABG_SHIFL, S1177, SF1097, FABG_CHLTR, CT_237, FABG_HAEIN, HI_0155, FABG_RICPR, RP762, FABG_VIBHA, FABG_MYCS2, MSMEG_3150, MSMEI_3069, FABG_STAAN, SA1074, FABG_RICBR, RBE_0116, FABG_RICFE, RF_1222, FABG_STAAC, SACOL1245, FABG_STAEQ, SERP0797, F…	chr1	632871	632143	2.12832	0.598537	2.0609
NELON_11635					chr1	2242880	2243422	1.13893	0.96084	2.06845
NELON_08870					chr1	1690640	1691113	1.73631	1.15225	2.10806
NELON_00020					chr1	1232	1774	1.79016	0.825129	2.11045
NELON_01305					chr1	252430	251537	2.46989	1.54244	2.12068
NELON_07315					chr1	1403930	1404961	1.54995	1.12369	2.13499
NELON_03295					chr1	632143	630920	2.16171	0.698312	2.14928
NELON_02855					chr1	539046	539567	2.261	1.05748	2.1613
NELON_02960					chr1	559720	558974	1.64968	0.830739	2.17015
NELON_03040					chr1	577982	579331	2.12948	0.553496	2.19859
NELON_02310					chr1	445633	444998	1.96142	0.953803	2.2038
NELON_03235					chr1	621770	618285	2.14717	0.70923	2.21034
rho	O18766, O62791, O62792, O62793, O62794, O62795, O62796, O62798, P02699, P02700, P08100, P28681, P29403, P32308, P49912, P9WHF3, Q28886, Q68J47, Q6W3E1, Q769E8, Q8HY69, Q95KU1, Q9KV50	RHO	Rhodopsin, Transcription termination factor Rho	OPSD_PIG, RHO, RHO1, OPSD_DELDE, OPSD_GLOME, OPSD_MESBI, OPSD_PHOVI, OPSD_PAGGO, OPSD_TRIMA, OPSD_TURTR, OPSD_BOVIN, OPSD_SHEEP, OPSD_HUMAN, OPN2, OPSD_CRIGR, OPSD_XENLA, OPSD_CANFA, OPSD_RABIT, RHO_MYCTU, Rv1297, MTCY373.17, OPSD_MACFA, OPSD_LOXAF, RH1, OPSD_CALPD, OPSD_OTOCR, OPSD_SMICR, OPSD_FELCA, Q9KV50_VIBCH, VC_0307	chr1	1439542	1440801	2.571	1.45584	2.22596
NELON_02965					chr1	560273	559770	1.7828	1.00643	2.23445
NELON_03010					chr1	573365	573970	2.16592	0.750144	2.24249
NELON_02860					chr1	539597	540964	2.76115	1.03706	2.24283
NELON_01810					chr1	341319	340723	2.22405	0.873695	2.26087
NELON_02090					chr1	397400	397750	2.25399	0.793805	2.27501
NELON_00420					chr1	76658	77770	1.78746	2.20595	2.28663
NELON_06195					chr1	1191834	1190209	2.25156	0.595928	2.29519
NELON_02895					chr1	545453	546619	2.23194	1.37507	2.29578
NELON_04730					chr1	910606	911916	2.23936	0.895866	2.29686
NELON_09910					chr1	1893545	1894408	2.55236	0.85825	2.31382
NELON_03310					chr1	634511	634008	2.23538	0.743803	2.31393
NELON_07350					chr1	1411164	1413083	2.89564	1.47864	2.31442
NELON_03290					chr1	630288	630761	2.44641	0.736225	2.31923
NELON_02880					chr1	541655	542737	2.28234	1.04717	2.33861
NELON_03690					chr1	705633	706448	2.29913	1.7184	2.34468
NELON_03935					chr1	756395	756210	1.81023	1.35943	2.37307
NELON_03270					chr1	628264	626969	2.14096	1.39694	2.40086
NELON_01800					chr1	340463	339492	2.69373	1.23041	2.40937
NELON_01820					chr1	342660	341884	2.3976	0.978985	2.41363
NELON_03120					chr1	596347	596652	1.85512	0.813057	2.42113
NELON_01035					chr1	191952	193463	2.29034	1.27196	2.46873
NELON_03005					chr1	572523	573368	2.33335	0.628814	2.48007
NELON_03700					chr1	708706	708248	1.24425	2.00778	2.51286
NELON_02230					chr1	427498	426521	2.14639	1.6059	2.52157
NELON_01270					chr1	241558	242919	2.33706	1.10181	2.53478
NELON_01805					chr1	340723	340448	2.31858	0.800592	2.6423
NELON_05540					chr1	1066756	1064960	2.45295	0.999103	2.64312
NELON_03265					chr1	626848	626483	3.20806	0.817914	2.65704
NELON_10475					chr1	2001970	2002650	3.6706	0.624466	2.67143
NELON_09500					chr1	1807707	1806571	2.15138	1.52261	2.68602
NELON_03500					chr1	666447	667952	2.42769	0.745993	2.6986
NELON_10420					chr1	1991720	1990329	2.38966	1.39322	2.69933
NELON_03140					chr1	600305	602098	4.28448	1.09957	2.71634
NELON_02305					chr1	444897	444064	2.14203	0.880308	2.72717
NELON_02995					chr1	571058	570111	2.87483	0.829043	2.76259
NELON_03020					chr1	574693	574992	2.43193	1.4087	2.7817
NELON_03115					chr1	596088	591910	2.85803	1.36685	2.79342
NELON_05685					chr1	1094982	1095731	3.87194	1.51469	2.79902
NELON_10440					chr1	1995586	1995110	2.3699	0.747733	2.83407
NELON_03175					chr1	609366	608827	2.83136	1.26543	2.85977
NELON_01815					chr1	341852	341352	2.88264	1.13078	2.8623
NELON_02470					chr1	473939	474157	1.83514	1.54801	2.89565
NELON_07320					chr1	1404988	1405650	1.80133	1.22919	2.95716
NELON_10525					chr1	2012163	2013500	3.46629	2.40983	2.96853
NELON_10855					chr1	2082631	2083557	2.82106	1.8019	2.97498
NELON_04085					chr1	787924	787247	2.41919	2.12827	2.99771
NELON_03050					chr1	580117	579797	3.14638	1.63338	3.09169
NELON_03035					chr1	577159	577893	2.80541	0.674318	3.09511
NELON_03145					chr1	602169	602504	4.82555	3.07009	3.15822
NELON_02915					chr1	549535	550446	2.90246	0.921024	3.18373
NELON_10490					chr1	2005810	2006247	2.97337	1.36613	3.20889
NELON_07680					chr1	1467234	1466524	3.44902	1.54159	3.26466
murC	A5PJI6, E2R0B0, F1SSC7, P94335, P9WJL7, Q5BKX8, Q9KPG8	MURC	Muscle-related coiled-coil protein, Uncharacterized protein, UDP-N-acetylmuramate--L-alanine ligase	MURC_BOVIN, MURC, E2R0B0_CANFA, F1SSC7_PIG, MURC_CORGL, Cgl2157, cg2368, MURC_MYCTU, Rv2152c, MTCY270.16, MURC_HUMAN, MURC_VIBCH, VC_2400	chr1	547998	549410	3.34262	0.94132	3.29879
NELON_03205					chr1	614294	612480	3.3295	1.2555	3.34271
NELON_03705					chr1	709226	708804	2.04914	1.85361	3.37218
amiC	P27017, P74390, P9WQ95	amiC	Aliphatic amidase expression-regulating protein, Negative aliphatic amidase regulator, Putative amidase AmiC	AMIC_PSEAE, amiC, PA3364, P74390_SYNY3, AMI3_MYCTU, Rv2888c, MTCY274.19c	chr1	610785	609478	4.26794	1.46527	3.4683
NELON_02925					chr1	551210	552457	3.12413	0.931097	3.61116
NELON_03210					chr1	614649	614287	4.27343	1.07417	3.6723
NELON_02920					chr1	550436	551185	3.30154	0.962268	3.71497
NELON_01020					chr1	188075	186510	1.59113	1.1082	3.75256
nusA	O83862, P9WIV3	nusA	N utilization substance protein A (NusA), Transcription termination/antitermination protein NusA	O83862_TREPA, nusA, TP_0892, TPANIC_0892, NUSA_MYCTU, Rv2841c, MTCY16B7.01, MTCY24A1.16	chr1	511256	509754	3.02097	1.27694	3.77911
NELON_03195					chr1	611440	612252	3.93682	0.940782	3.83875
NELON_02715					chr1	515381	513843	2.56416	1.71882	3.88742
NELON_03250					chr1	622679	623443	2.87259	0.452422	3.94134
NELON_03135					chr1	600073	599210	6.89004	1.34614	4.30379
NELON_02535					chr1	484414	483983	3.18673	6.36447	4.39086
NELON_03230					chr1	617793	618206	3.96832	0.470933	4.40453
NELON_10980					chr1	2108412	2109218	2.81256	1.89774	4.46891
NELON_02985					chr1	564739	566643	4.60755	1.15332	4.47333
NELON_01545					chr1	289325	288450	5.27986	1.40594	4.71615
NELON_03185					chr1	611240	610755	5.62594	2.97874	5.06091
actP					chr1	1470971	1469283	2.60568	0.99092	5.48853
NELON_05240					chr1	1008723	1009199	4.94126	1.85337	5.80522
NELON_07695					chr1	1471288	1470968	4.04174	0.917736	6.33012
NELON_05125					chr1	985014	986375	6.73246	2.5409	10.9143
NELON_06200					chr1	1192426	1191935	14.4391	1.38582	14.228
